# Supplementary material for: Ferrocenyl–triazole complexes and their use in heavy metal cation sensing
Source: Royal Society of Chemistry journal article supplement (doi:10.1039/d4ra04023f), 2024-01-01
Supplement: d4ra04023f1.pdf [file d4ra04023f1.pdf]

For Supporting Information

## **Ferrocenyl-Triazole Complexes and their Use in Heavy Metal Cation Sensing**

Khaled Al Khalyfeh<sup>a\*</sup>, Asma Ghazzy<sup>b,c</sup>, Randa M Al-As'ada<sup>a</sup>, Tobias Ruffer<sup>d</sup>, Olfa Kanoun<sup>e</sup>, Heinrich Lang<sup>f</sup>

- a. Department of Chemistry, Faculty of Natural Science, Al-Hussein Bin Talal University, Ma'an 71111, Jordan.
- b. Faculty of Pharmacy. Faculty of Pharmacy and Applied Medical Sciences, Al-Ahliyya Amman University, Amman 19328, Jordan.
- c. Pharmacological and Diagnostic Research Center, Faculty of Pharmacy and Allied Medical Sciences, Al-Ahliyya Amman University. Amman 19328, Jordan.
- d. Department of Inorganic Chemistry, Chemnitz University of Technology, 09126 Chemnitz, Germany..
- e. Professorship Measurement and Sensor Technology, Chemnitz University of Technology, 09126 Chemnitz, Germany.
- f. Research Center for Materials, Architectures and Integration of Nanomembranes (MAIN), Research Group Organometallics, Chemnitz University of Technology, 09126 Chemnitz, Germany.

\* E-mail: k.khalyfeh@ahu.edu.jo.

## Table of Content:

|                                                                                                                                                                                       |    |
|---------------------------------------------------------------------------------------------------------------------------------------------------------------------------------------|----|
| <b>Table S 1.</b> Selected bond distances (Å), angles (°), and plane intersections (°) of <b>3</b> , <b>7</b> and <b>9</b> .....                                                      | 3  |
| <b>Table S 2.</b> Percentage contributions to the Hirshfeld surface of <b>3</b> , <b>7</b> and <b>9</b> .....                                                                         | 4  |
| <b>Table S 3.</b> Comparison of LODs for different electrochemical sensor for Cd <sup>2+</sup> , Pb <sup>2+</sup> and Cu <sup>2+</sup> determination.....                             | 4  |
| <b>Figure S 1.</b> Illustration of C–H···N (black) contacts in <b>3</b> .....                                                                                                         | 4  |
| <b>Figure S 2.</b> Illustration of $\pi$ ... $\pi$ stacking in <b>3</b> .....                                                                                                         | 5  |
| <b>Figure S 3.</b> Illustration of C–H··· $\pi$ contacts, C–H···H–C stacking and $\pi$ ... $\pi$ stacking in <b>7</b> .....                                                           | 5  |
| <b>Figure S 4.</b> Illustration of C–H··· $\pi$ and C–H···N contacts in <b>7</b> .....                                                                                                | 6  |
| <b>Figure S 5.</b> Intermolecular interaction within the crystal packing of <b>9</b> .....                                                                                            | 6  |
| <b>Figure S 6.</b> Intermolecular interaction within the crystal packing of <b>9</b> .....                                                                                            | 6  |
| <b>Figure S 7.</b> Illustration of $\pi$ ... $\pi$ stacking, C–H···O contacts, C–H···C contacts, C–H···C contacts, N···N contacts and CH <sub>2</sub> ···C contacts in <b>9</b> ..... | 7  |
| <b>Figure S 8.</b> Full 2-D fingerprint plot for <b>3</b> representing intermolecular interactions.....                                                                               | 7  |
| <b>Figure S 9.</b> Full 2-D fingerprint plot for <b>7</b> representing intermolecular interactions.....                                                                               | 8  |
| <b>Figure S 10.</b> Full 2-D fingerprint plot for <b>9</b> representing intermolecular interactions.....                                                                              | 8  |
| <b>Figure S 11.</b> <sup>1</sup> H NMR spectrum of <b>3</b> in CDCl <sub>3</sub> .....                                                                                                | 9  |
| <b>Figure S 12.</b> <sup>1</sup> H NMR spectrum of <b>6</b> in CDCl <sub>3</sub> .....                                                                                                | 9  |
| <b>Figure S 13.</b> <sup>1</sup> H NMR spectrum of <b>7</b> in CDCl <sub>3</sub> .....                                                                                                | 10 |
| <b>Figure S 14.</b> <sup>1</sup> H NMR spectrum of <b>9</b> in CDCl <sub>3</sub> .....                                                                                                | 10 |
| <b>Figure S 15.</b> <sup>13</sup> C NMR spectrum of <b>3</b> in CDCl <sub>3</sub> .....                                                                                               | 11 |
| <b>Figure S 16.</b> <sup>13</sup> C NMR spectrum of <b>6</b> in CDCl <sub>3</sub> .....                                                                                               | 11 |
| <b>Figure S 17.</b> <sup>13</sup> C NMR spectrum of <b>7</b> in CDCl <sub>3</sub> .....                                                                                               | 12 |
| <b>Figure S 18.</b> <sup>13</sup> C NMR spectrum of <b>9</b> in CDCl <sub>3</sub> .....                                                                                               | 12 |
| <b>Figure S 19.</b> ESI-TOF Mass spectrum of <b>3</b> .....                                                                                                                           | 13 |
| <b>Figure S 20.</b> ESI-TOF Mass spectrum of <b>6</b> .....                                                                                                                           | 13 |
| <b>Figure S 21.</b> ESI-TOF Mass spectrum of <b>7</b> .....                                                                                                                           | 14 |
| <b>Figure S 22.</b> ESI-TOF Mass spectrum of <b>9</b> .....                                                                                                                           | 14 |
| <b>Figure S 23.</b> IR spectrum of <b>3</b> .....                                                                                                                                     | 15 |
| <b>Figure S 24.</b> IR spectrum of <b>6</b> .....                                                                                                                                     | 15 |
| <b>Figure S 25.</b> IR spectrum of <b>7</b> .....                                                                                                                                     | 16 |
| <b>Figure S 26.</b> IR spectrum of <b>9</b> .....                                                                                                                                     | 16 |

**Table S 1.** Selected bond distances (Å), angles (°), and plane intersections (°) of **3**, **7** and **9**.

| Selected bond distances (Å) |          |                   |           |                   |           |
|-----------------------------|----------|-------------------|-----------|-------------------|-----------|
| <b>3</b>                    |          | <b>7</b>          |           | <b>9</b>          |           |
| C(1)–C(2)                   | 1.497(8) | C(1)–N(1)         | 1.45(2)   | C(11)–C(12)       | 1.364(11) |
| C(1)–N(1)                   | 1.477(6) | C(11)–C(12)       | 1.42(3)   | C(11)–N(1)        | 1.352(9)  |
| C(2)–C(3)                   | 1.371(9) | C(11)–N(1)        | 1.38(3)   | C(12)–C(13)       | 1.504(11) |
| C(2)–N(2)                   | 1.358(8) | C(12)–C(13)       | 1.48(3)   | C(12)–N(3)        | 1.378(11) |
| C(3)–N(4)                   | 1.346(8) | C(12)–N(3)        | 1.44(3)   | C(13)–N(4)        | 1.513(14) |
| C(4)–N(4)                   | 1.427(8) | C(13)–O(1)        | 1.41(2)   | C(31)–C(32)       | 1.361(12) |
| N(2)–N(3)                   | 1.330(7) | C(21)–N(4)        | 1.48(2)   | C(31)–N(5)        | 1.346(10) |
| N(3)–N(4)                   | 1.343(7) | C(31)–C(32)       | 1.45(3)   | C(32)–C(33)       | 1.492(12) |
|                             |          | C(31)–N(4)        | 1.37(2)   | C(32)–N(7)        | 1.372(12) |
|                             |          | C(32)–C(33)       | 1.46(3)   | C(33)–N(8)        | 1.440(13) |
|                             |          | C(32)–N(6)        | 1.41(3)   | C(6)–N(1)         | 1.410(9)  |
|                             |          | C(33)–O(1)        | 1.38(2)   | N(1)–N(2)         | 1.350(9)  |
|                             |          | N(1)–N(2)         | 1.43(2)   | N(2)–N(3)         | 1.315(9)  |
|                             |          | N(2)–N(3)         | 1.33(2)   | N(5)–N(6)         | 1.351(9)  |
|                             |          | N(4)–N(5)         | 1.37(3)   | N(6)–N(7)         | 1.330(9)  |
|                             |          | N(5)–N(6)         | 1.32(2)   |                   |           |
| Selected bond angles (°)    |          |                   |           |                   |           |
| <b>3</b>                    |          | <b>7</b>          |           | <b>9</b>          |           |
| C(1)#1–N(1)–C(1)            | 109.5(4) | C(11)–C(12)–C(13) | 125(2)    | C(11)–C(12)–C(13) | 130.6(8)  |
| C(1)#1–N(1)–C(1)#2          | 109.5(4) | C(11)–C(12)–N(3)  | 111.0(17) | C(11)–C(12)–N(3)  | 108.1(7)  |
| C(1)#2–N(1)–C(1)            | 109.5(4) | C(11)–N(1)–C(1)   | 127.5(18) | C(11)–N(1)–C(6)   | 127.9(7)  |
| C(3)–C(2)–C(1)              | 128.0(7) | C(11)–N(1)–N(2)   | 114.3(16) | C(12)–C(11)–N(1)  | 105.0(7)  |
| C(3)–N(4)–C(4)              | 127.6(6) | C(31)–C(32)–C(33) | 126(2)    | C(31)–C(32)–C(33) | 129.6(9)  |
| N(1)–C(1)–C(2)              | 112.5(5) | C(31)–N(4)–C(21)  | 123.5(18) | C(31)–C(32)–N(7)  | 108.6(8)  |
| N(2)–C(2)–C(1)              | 123.7(6) | C(31)–N(4)–N(5)   | 116.3(16) | C(31)–N(5)–C(26)  | 127.8(7)  |
| N(2)–C(2)–C(3)              | 108.3(6) | C(33)–O(1)–C(13)  | 112.3(16) | N(2)–N(1)–C(11)   | 111.0(6)  |
| N(2)–N(3)–N(4)              | 106.9(5) | N(1)–C(11)–C(12)  | 100.9(19) | N(2)–N(1)–C(6)    | 121.1(6)  |
| N(3)–N(2)–C(2)              | 108.7(5) | N(2)–N(1)–C(1)    | 118.1(16) | N(2)–N(3)–C(12)   | 108.8(7)  |
| N(3)–N(4)–C(3)              | 111.0(5) | N(2)–N(3)–C(12)   | 108.1(17) | N(3)–C(12)–C(13)  | 121.2(8)  |
| N(3)–N(4)–C(4)              | 121.1(6) | N(3)–C(12)–C(13)  | 124.5(19) | N(3)–N(2)–N(1)    | 107.1(6)  |
| N(4)–C(3)–C(2)              | 105.0(6) | N(3)–N(2)–N(1)    | 105.6(15) | N(4)–C(13)–C(12)  | 112.0(8)  |
|                             |          | N(4)–C(31)–C(32)  | 99.4(18)  | N(5)–C(31)–C(32)  | 104.6(8)  |
|                             |          | N(5)–N(4)–C(21)   | 120.2(17) | N(6)–N(5)–C(26)   | 120.0(6)  |
|                             |          | N(5)–N(6)–C(32)   | 108.8(19) | N(6)–N(5)–C(31)   | 112.1(7)  |
|                             |          | N(6)–C(32)–C(31)  | 109.6(17) | N(6)–N(7)–C(32)   | 108.9(7)  |
|                             |          | N(6)–C(32)–C(33)  | 124(2)    | N(7)–C(32)–C(33)  | 121.7(9)  |
|                             |          | N(6)–N(5)–N(4)    | 105.9(18) | N(7)–N(6)–N(5)    | 105.8(7)  |
|                             |          | O(1)–C(13)–C(12)  | 109.7(17) |                   |           |
|                             |          | O(1)–C(33)–C(32)  | 112.8(18) |                   |           |
|                             |          |                   |           | N(8)–C(33)–C(32)  | 117.0(8)  |

**Table S 2.** Percentage contributions to the Hirshfeld surface of **3**, **7** and **9**.

| Contents    | Included surface area |          |          |
|-------------|-----------------------|----------|----------|
|             | <b>3</b>              | <b>7</b> | <b>9</b> |
| H...H       | 60.3                  | 49.7     | 62.6     |
| H...N/N...H | 21.2                  | 23.6     | 17.4     |
| H...C/C...H | 13.2                  | 19.3     | 12.9     |
| C...C       | 2.5                   | 4.3      | 2.9      |
| N...C/C...N | 2.7                   | 1.4      | 1.7      |
| H...O/O...H |                       | 1.6      | 1.4      |
| N...N       |                       |          | 1.1      |

**Table S 3.** Comparison of LODs for different electrochemical sensor for Cd<sup>2+</sup>, Pb<sup>2+</sup> and Cu<sup>2+</sup> determination.

| Modified Electrode                | LOD {Cd <sup>2+</sup> } | LOD {Pb <sup>2+</sup> } | LOD {Cu <sup>2+</sup> } | [Ref]     |
|-----------------------------------|-------------------------|-------------------------|-------------------------|-----------|
| Ferrocenyl-Trizol<br>3@SPCE       | 9.2 nM                  | 6.3 nM                  | 20.1 nM                 | This work |
| Ferrocenyl-Trizol<br>6@SPCE       | 30.5 nM                 | 8.7 nM                  | 23.9 nM                 | This work |
| Ferrocenyl-Trizol<br>7@SPCE       | 4.3 nM                  | 29.0 nM                 | 7.1 nM                  | This work |
| Ferrocenyl-Trizol<br>3@SPCE       | 3.7 nM                  | 32.0 nM                 | 7.1 nM                  | This work |
| Fc-NH <sub>2</sub> -Ni-MOF        | 7.1 nM                  | 0.2 nM                  | 6.3 nM                  | 1         |
| trGNO/Fc-NH <sub>2</sub> -UiO-66. | 8.5 nM                  | 0.6 nM                  | 0.8 nM                  | 2         |
| RGO-CS/PLL/GCE                    | 10.0 nM                 | 20.0 nM                 | 20.0 nM                 | 3         |
| NMC                               | 1500 nM                 | 50 nM                   | –                       | 4         |
| ZJU-27/GCE                        | 1.66 nM                 | 1.1 nM                  | –                       | 5         |
| GAs-UiO-66-NH <sub>2</sub> /GCE   | 9.0 nM                  | 1.0 nM                  | 8.0 nM                  | 6         |

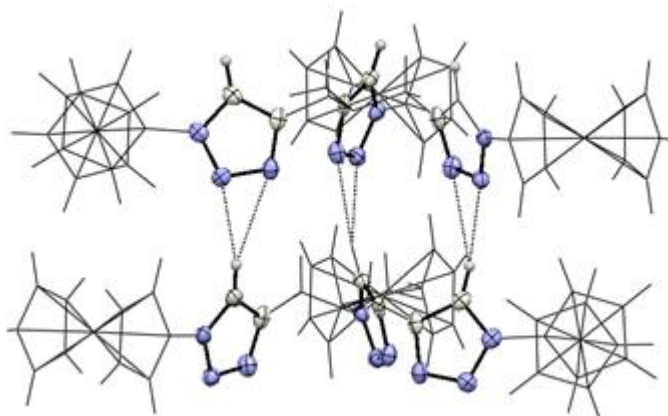**Figure S 1.** Illustration of C–H...N (black) contacts in **3**.

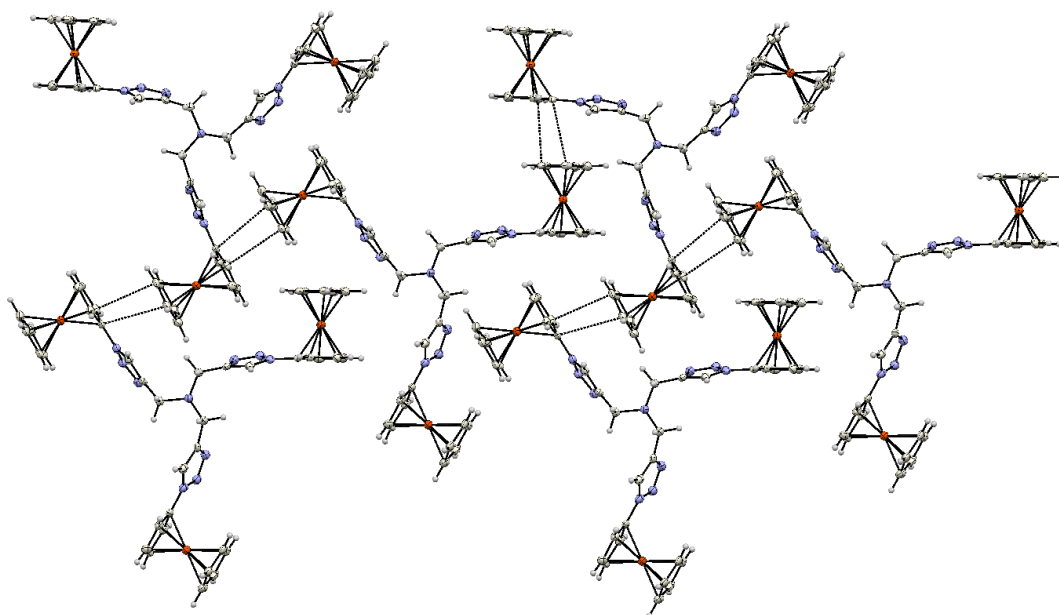

**Figure S 2.** Illustration of  $\pi$ ... $\pi$  stacking in **3**.

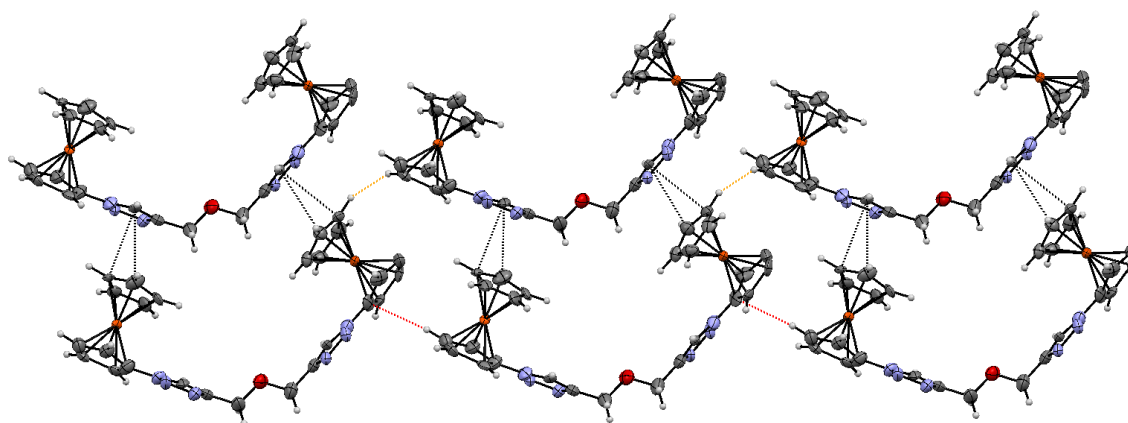

**Figure S 3.** Illustration of C-H... $\pi$  contacts (red), C-H...H-C stacking (orange) and  $\pi$ ... $\pi$  stacking (black) in **7**.

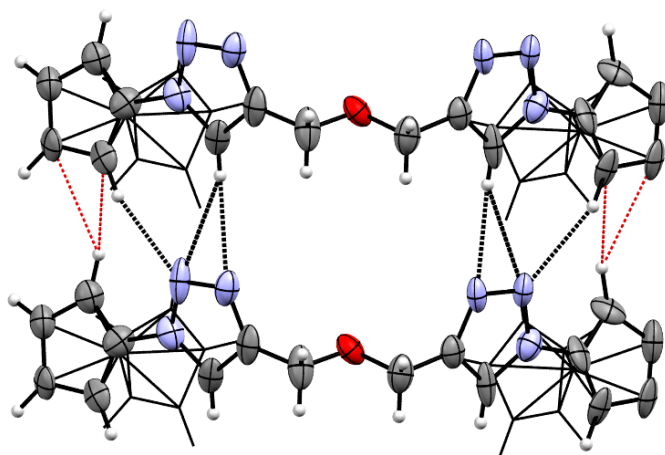

**Figure S 4.** Illustration of C–H... $\pi$  (red) and C–H...N (black) contacts in **7**.

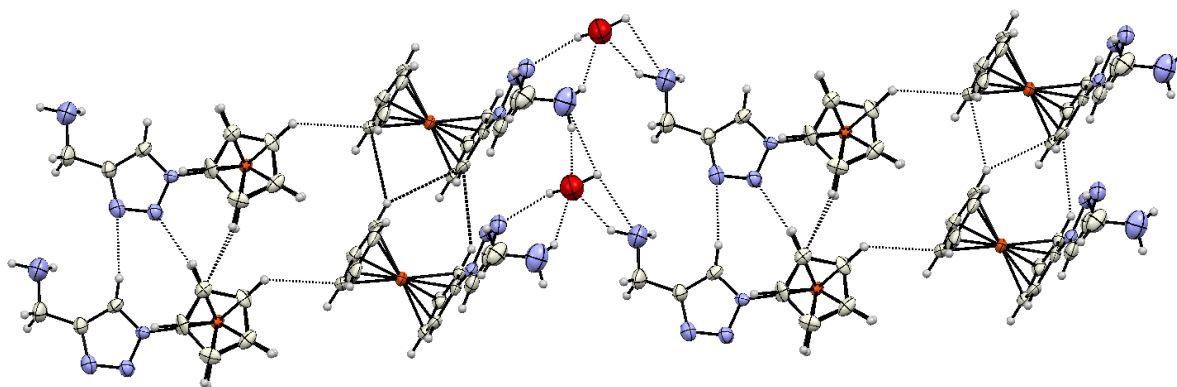

**Figure S 5.** Intermolecular interaction within the crystal packing of **9**.

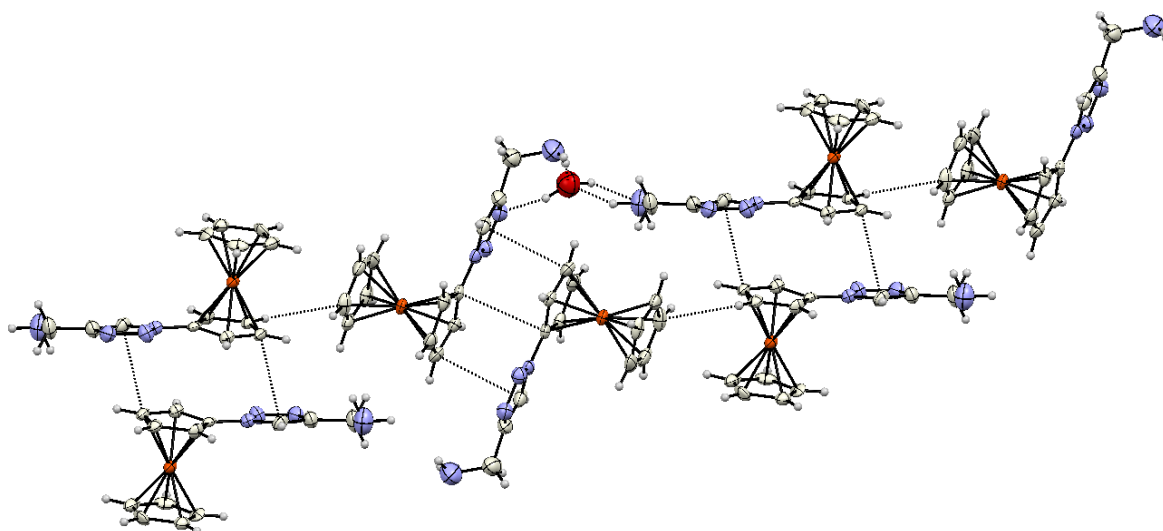

**Figure S 6.** Intermolecular interaction within the crystal packing of **9**.

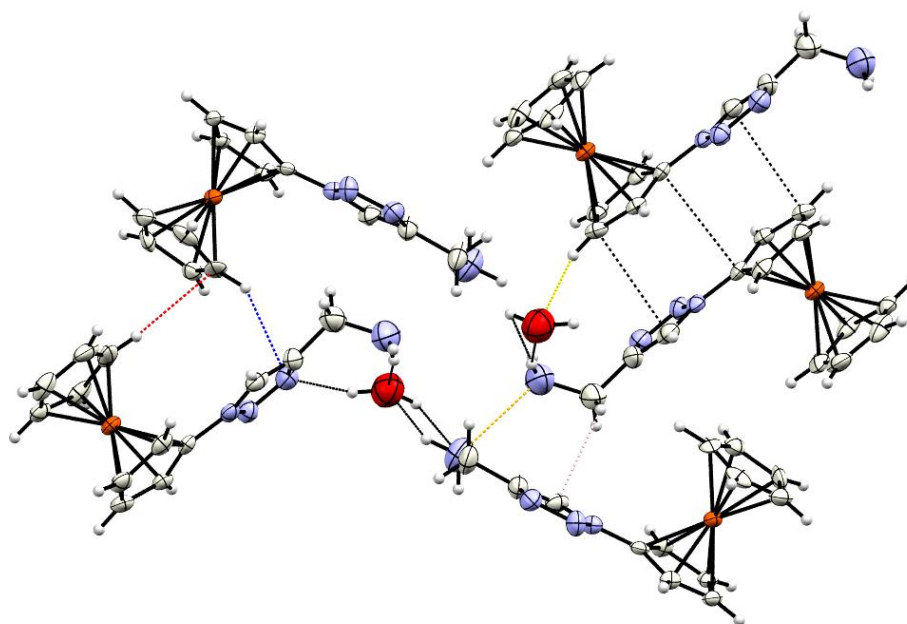

**Figure S 7.** Illustration of  $\pi$ ... $\pi$  stacking (black), C-H...O contacts (yellow), C-H...C contacts (blue), C-H...C contacts (red), N ... N contacts (orange) and CH<sub>2</sub>...C contacts (pink) in **9**.

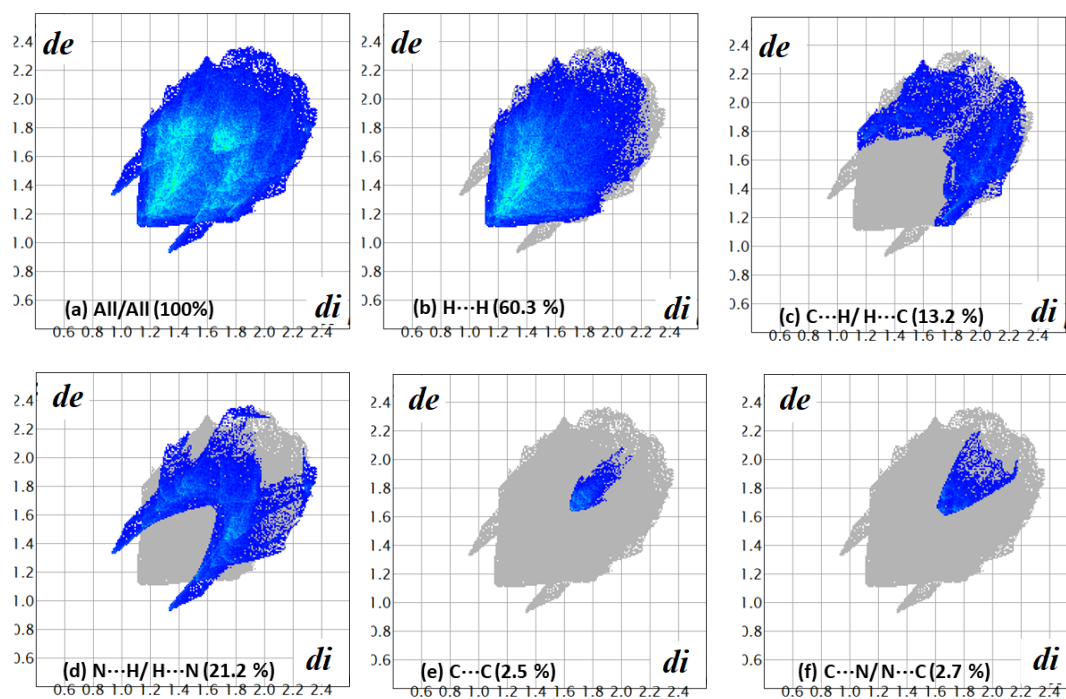

**Figure S 8.** Full 2-D fingerprint plot for **3**. (a) and the decomposed contacts representing (b) H...H (60.3 %), (c) C...H/H...C (13.2 %), (d) N...H/ H...N (21.2 %), (e) C...C (2.5 %) and (f) C...N/N...C (2.1 %) intermolecular interactions.

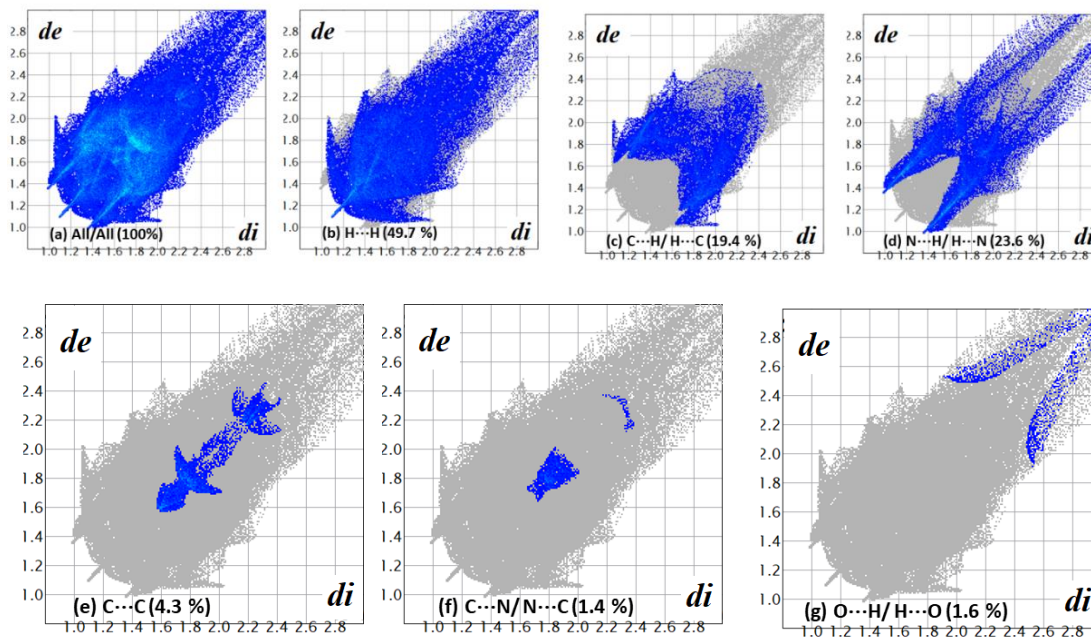

**Figure S 9.** Full 2-D fingerprint plot for 7. (a) and the decomposed contacts representing (b) H...H (49.7 %), (c) C...H/H...C (19.4 %), (d) N...H/ H...N (23.6 %), (e) C...C (4.3 %), (f) C...N/N...C (2.1 %), (g) O...H/ H...O (1.6 %) intermolecular interactions.

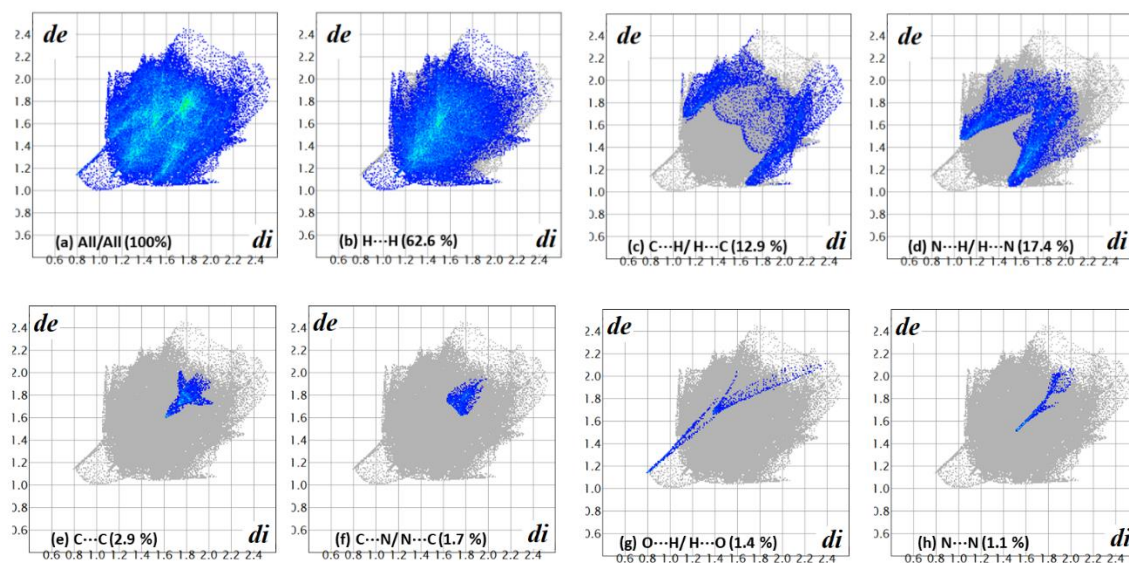

**Figure S 10.** Full 2-D fingerprint plot for 9. (a) and the decomposed contacts representing (b) H...H (62.6 %), (c) C...H/H...C (12.9 %), (d) N...H/ H...N (17.4 %), (e) C...C (2.9 %), (f) C...N/N...C (1.7 %), (g) O...H/ H...O (1.4 %) and (h) N...N (1.1 %) intermolecular interactions.



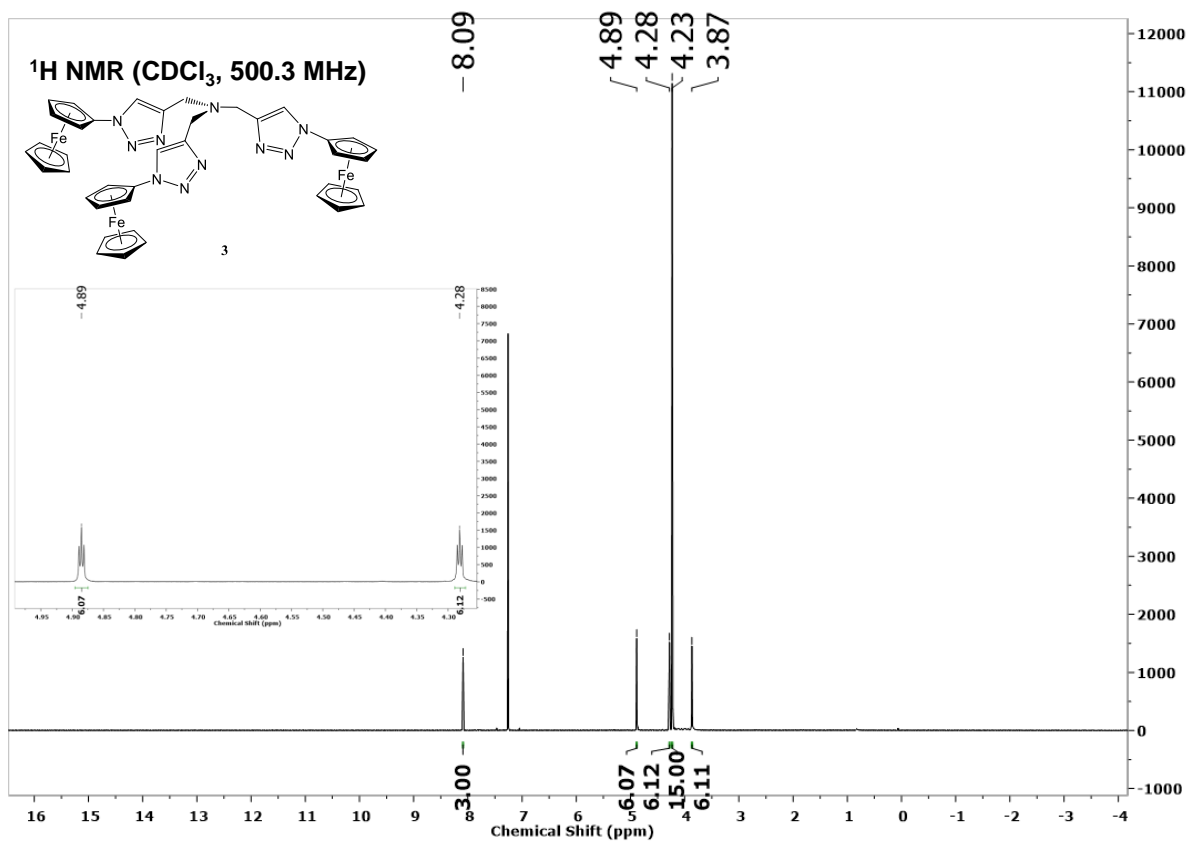

Figure S 11. <sup>1</sup>H NMR spectrum of **3** in CDCl<sub>3</sub>.

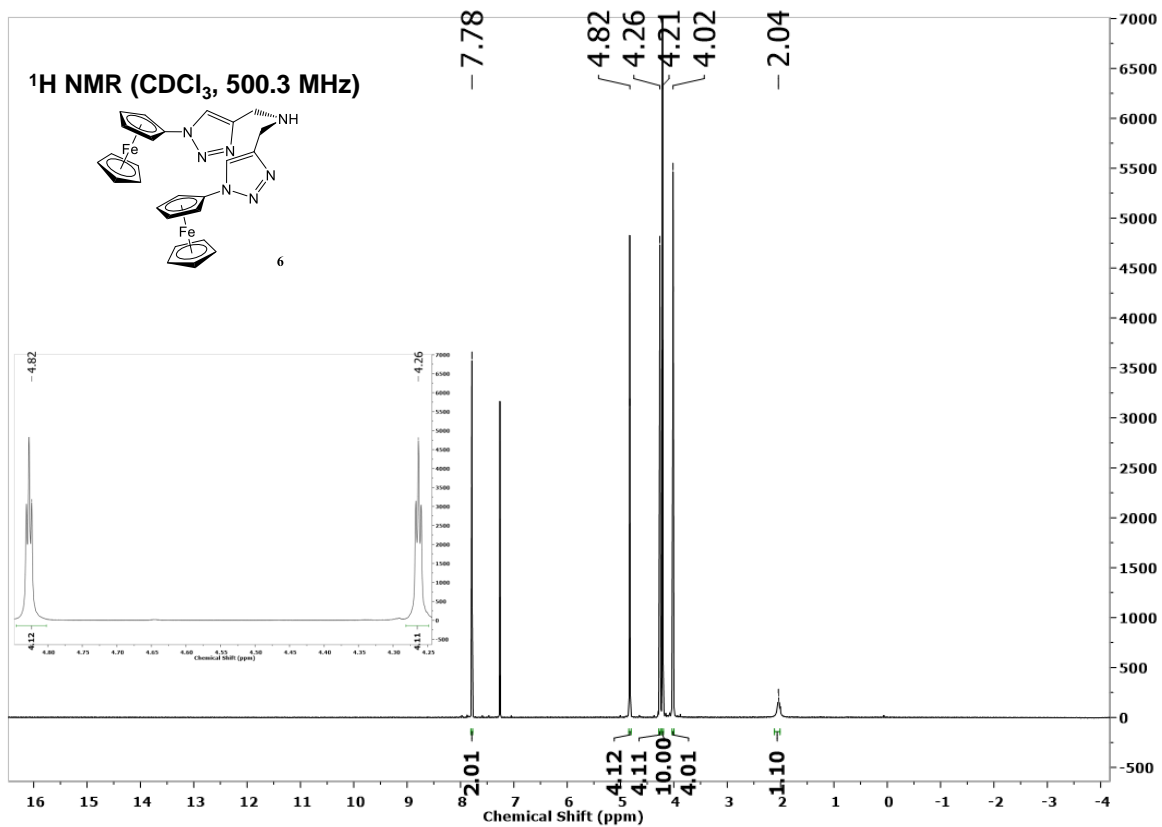

Figure S 12. <sup>1</sup>H NMR spectrum of **6** in CDCl<sub>3</sub>.

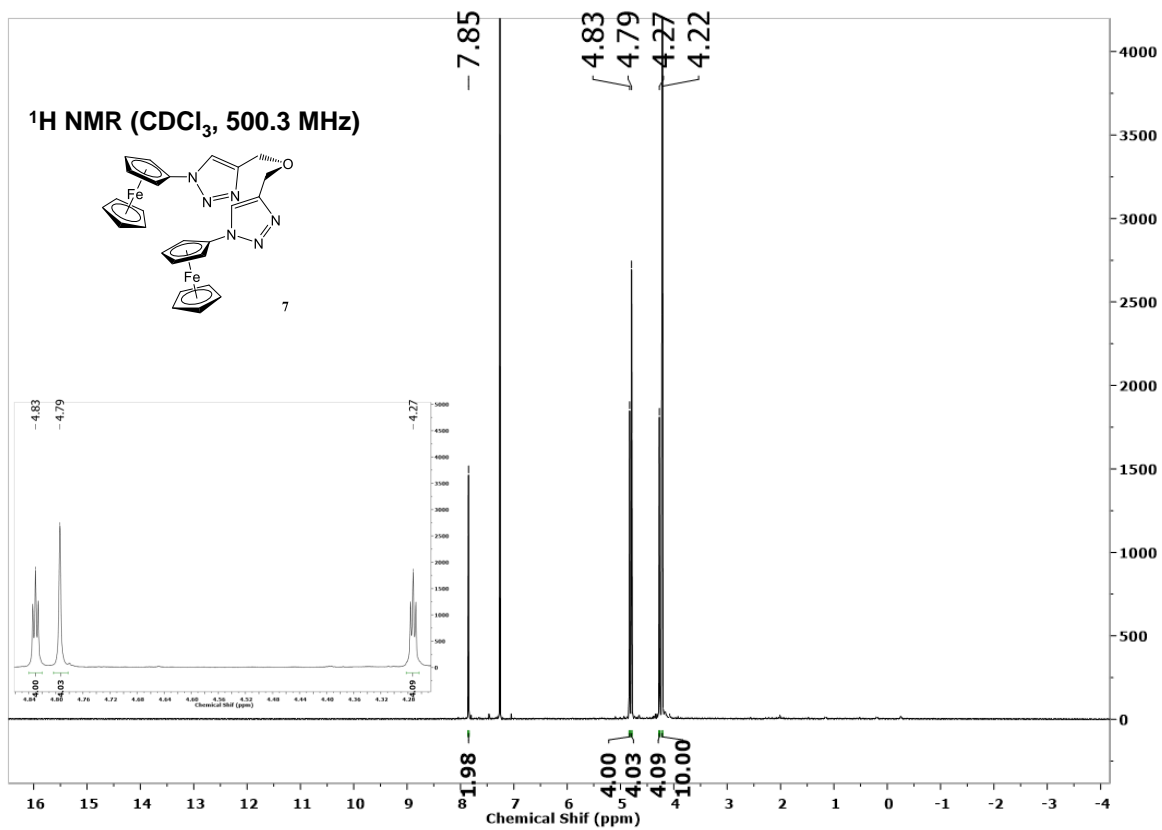

**Figure S 13.** <sup>1</sup>H NMR spectrum of **7** in CDCl<sub>3</sub>.

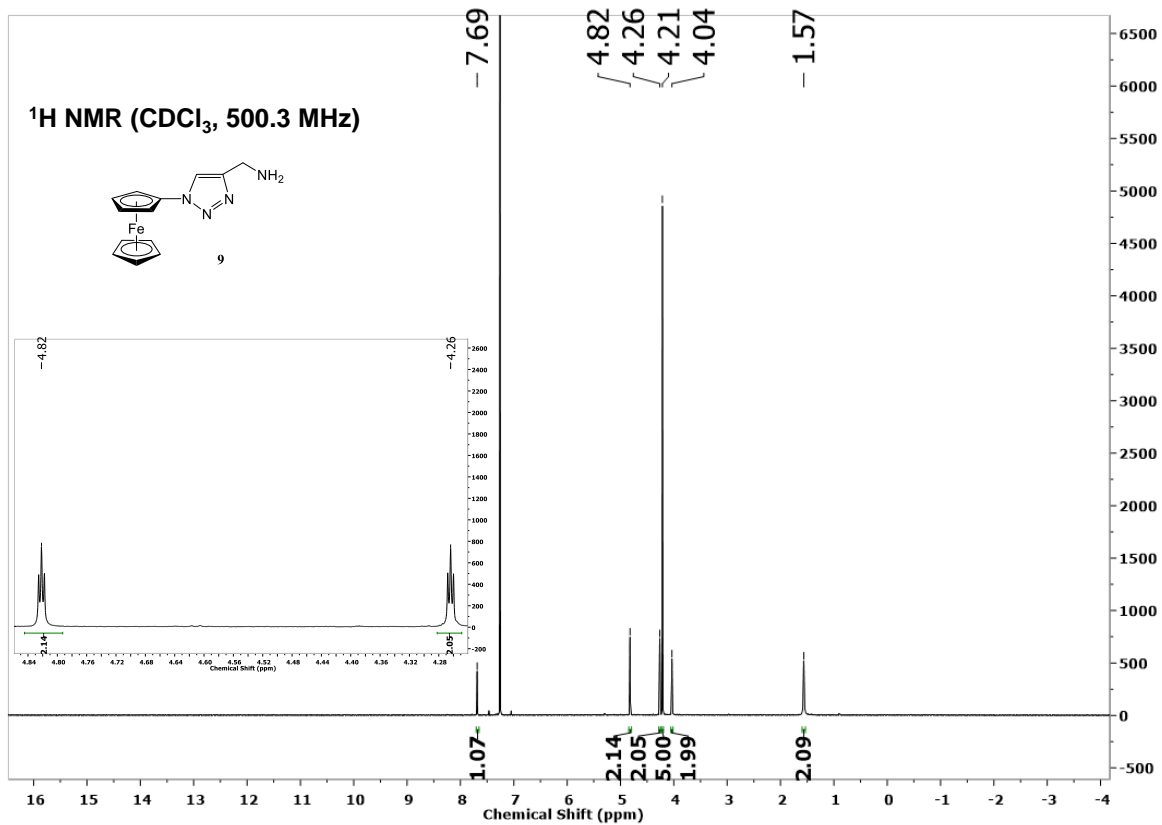

**Figure S 14.** <sup>1</sup>H NMR spectrum of **9** in CDCl<sub>3</sub>.

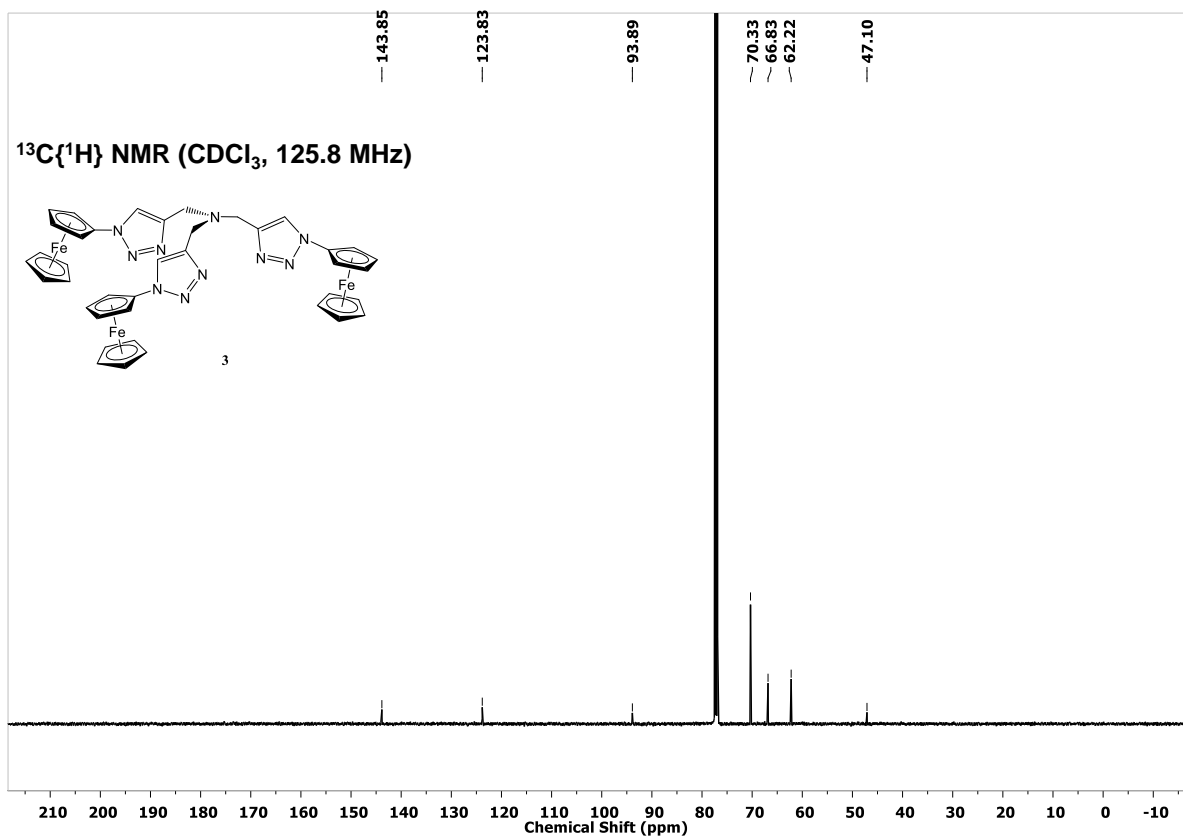

**Figure S 15.**  $^{13}\text{C}$  NMR spectrum of **3** in  $\text{CDCl}_3$ .

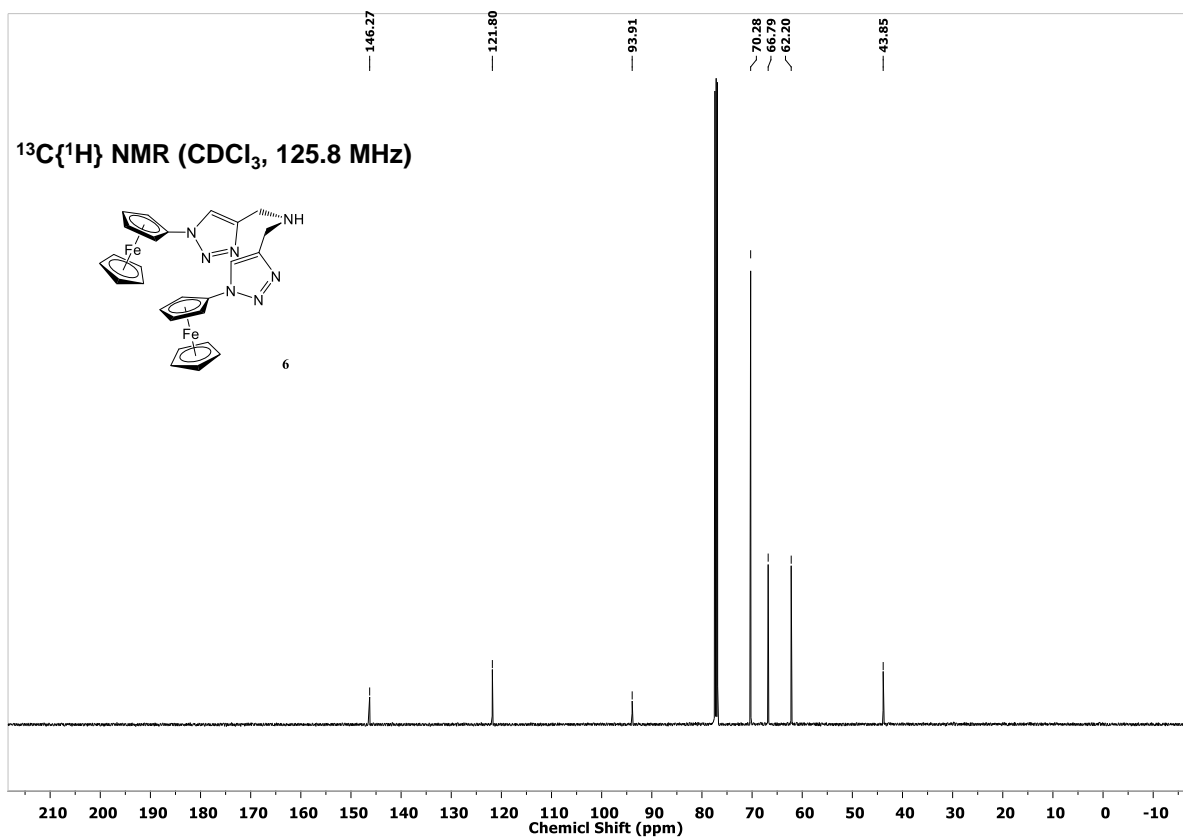

**Figure S 16.**  $^{13}\text{C}$  NMR spectrum of **6** in  $\text{CDCl}_3$ .

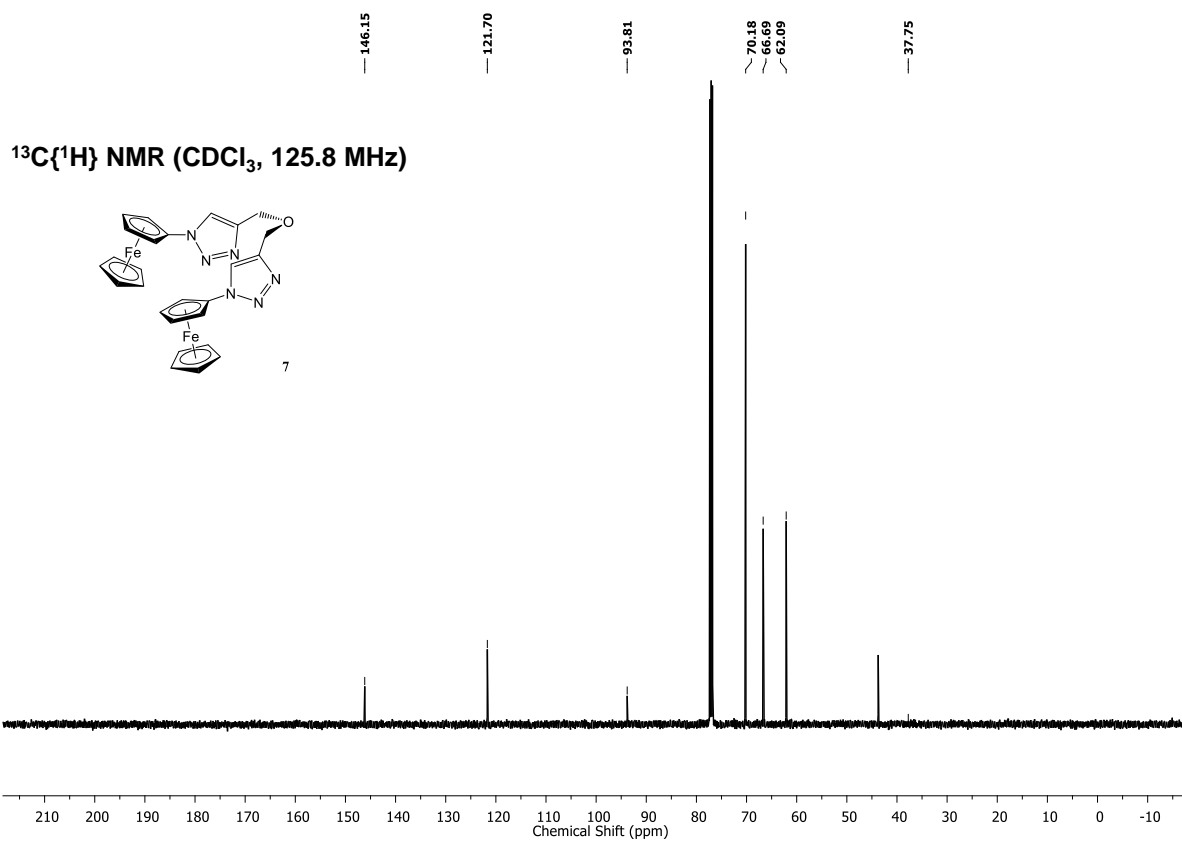

**Figure S 17.**  $^{13}\text{C}$  NMR spectrum of **7** in  $\text{CDCl}_3$ .

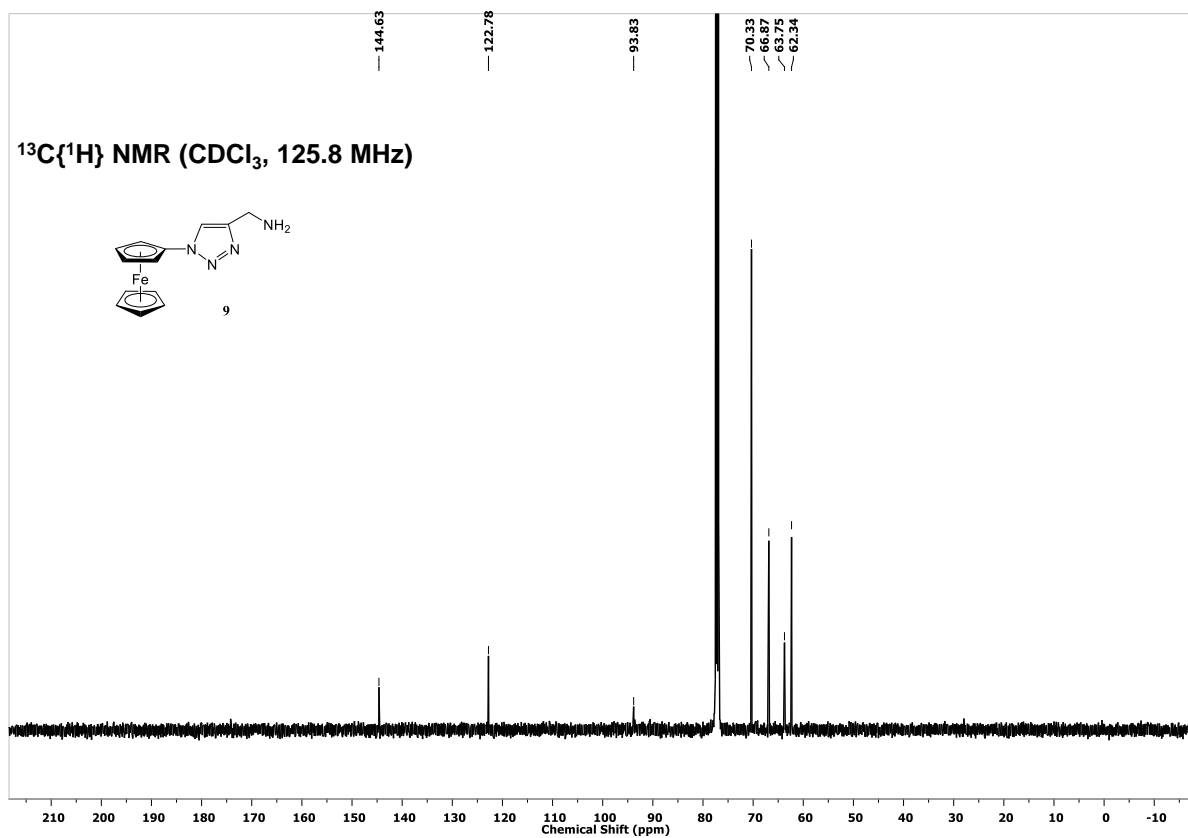

**Figure S 18.**  $^{13}\text{C}$  NMR spectrum of **9** in  $\text{CDCl}_3$ .

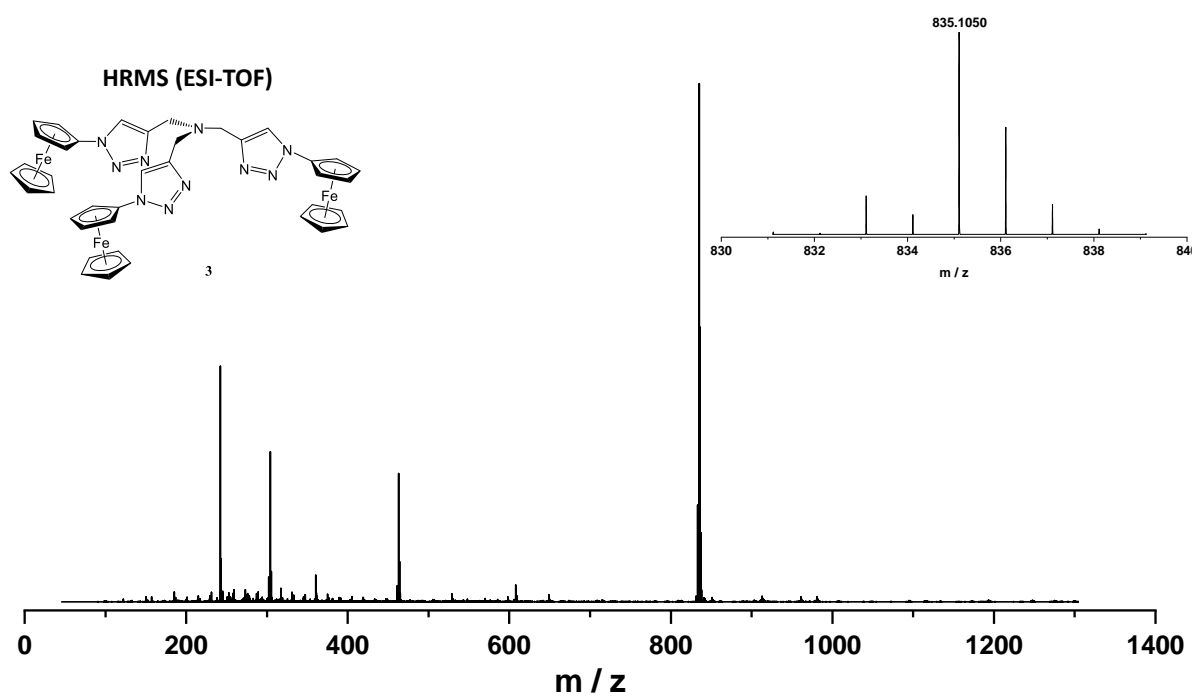

Figure S 19. ESI-TOF Mass spectrum of 3.

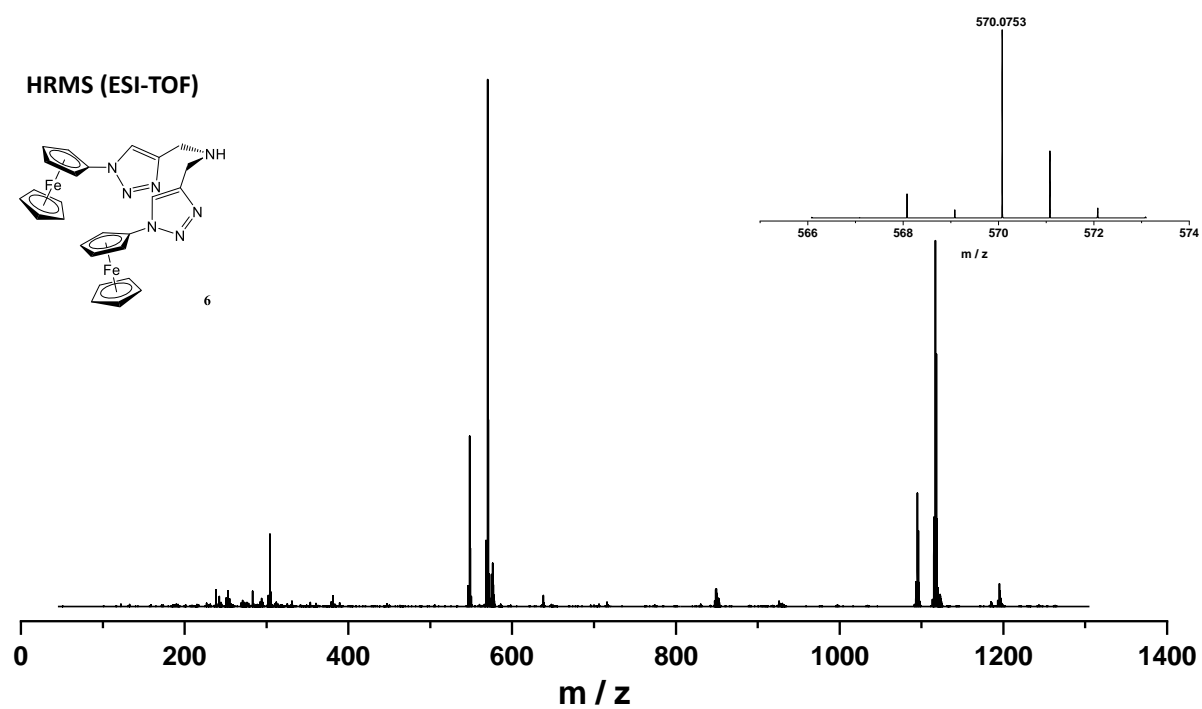

Figure S 20. ESI-TOF Mass spectrum of 6.

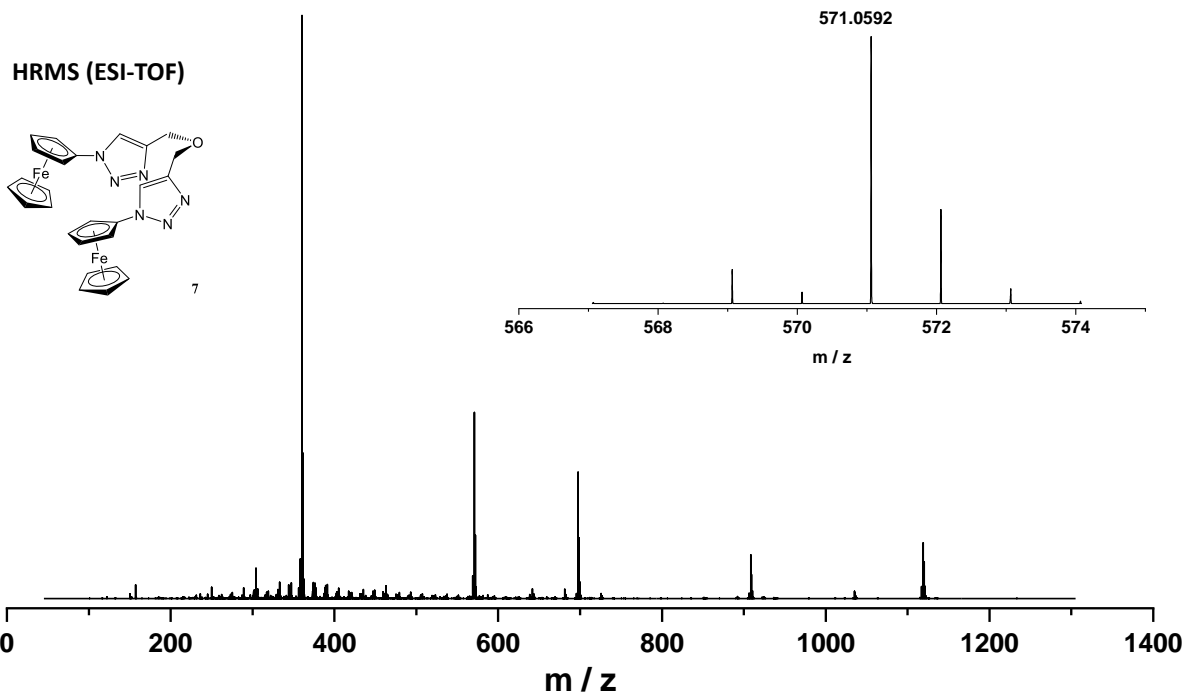

**Figure S 21.** ESI-TOF Mass spectrum of **7**.

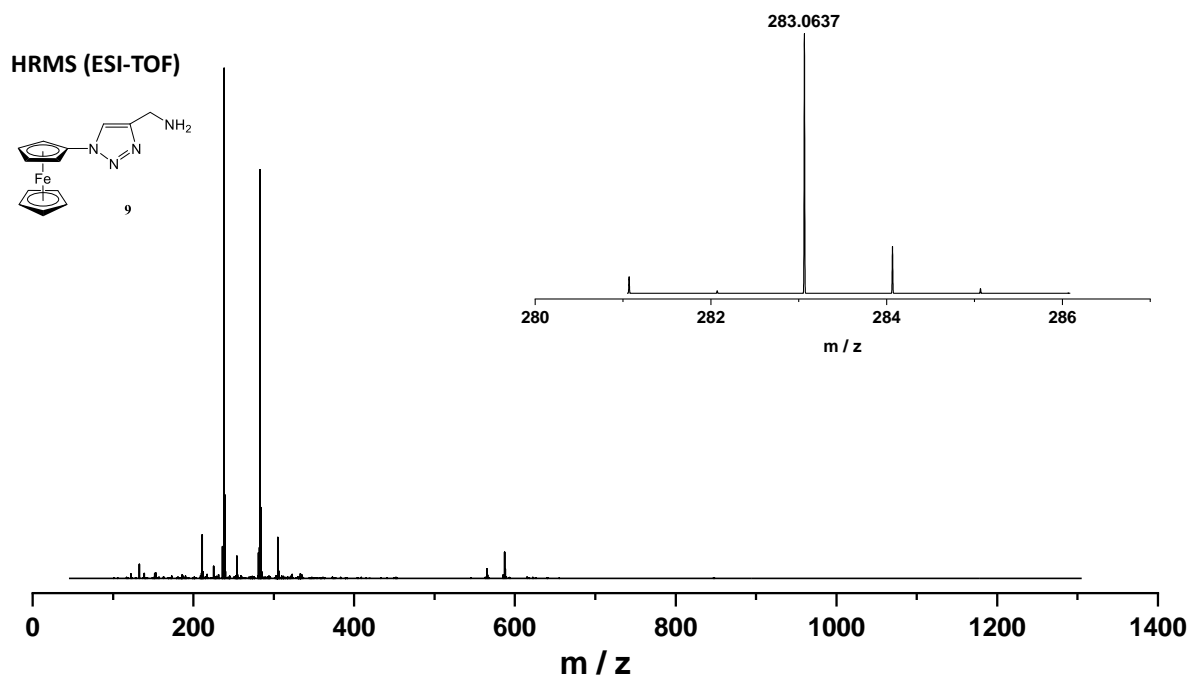

**Figure S 22.** ESI-TOF Mass spectrum of **9**.

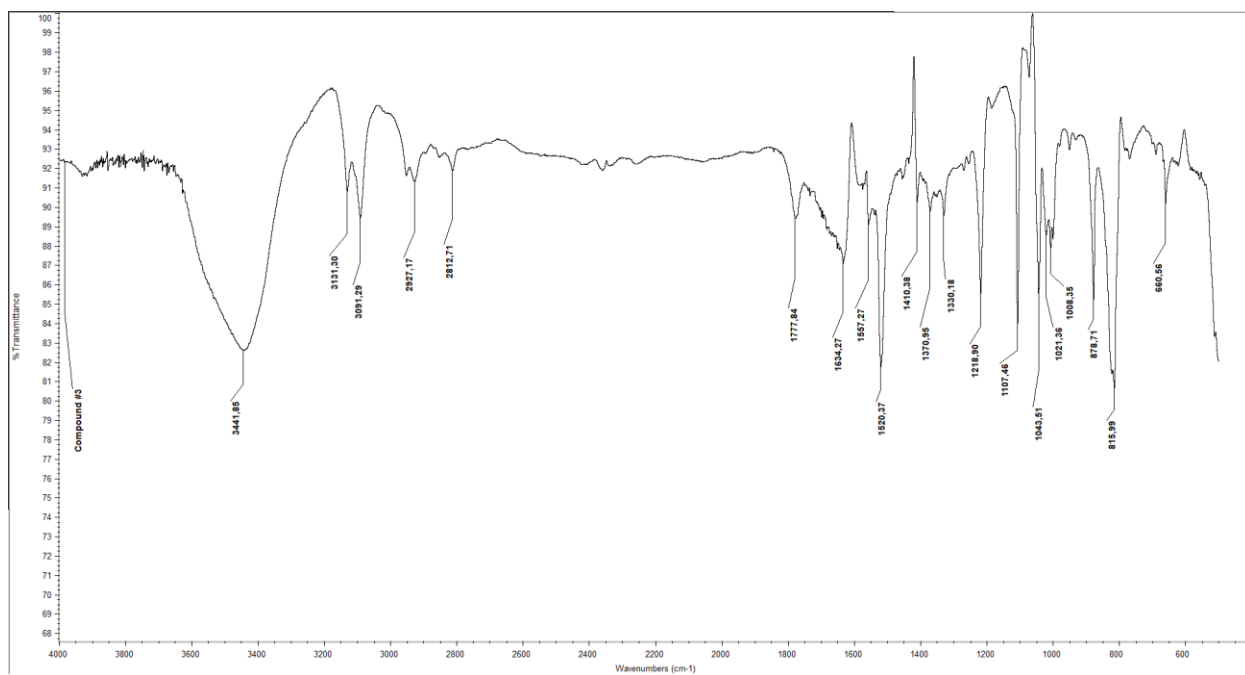

Figure S 23. IR spectrum of 3.

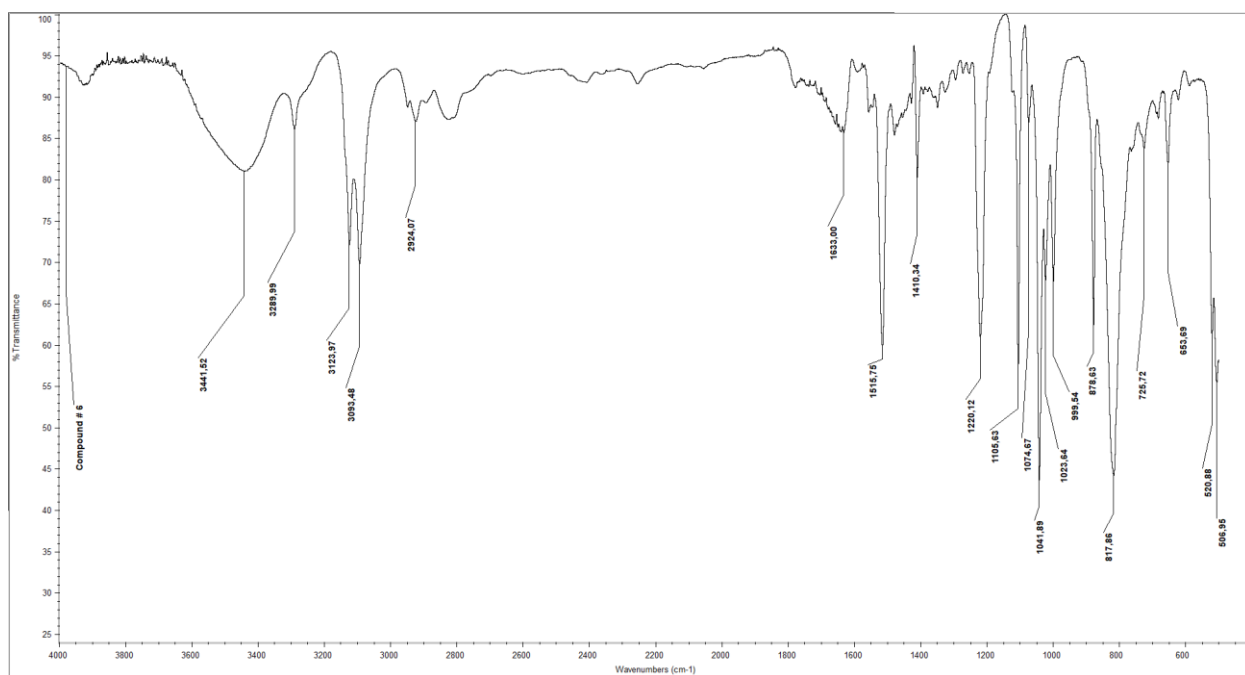

Figure S 24. IR spectrum of 6.

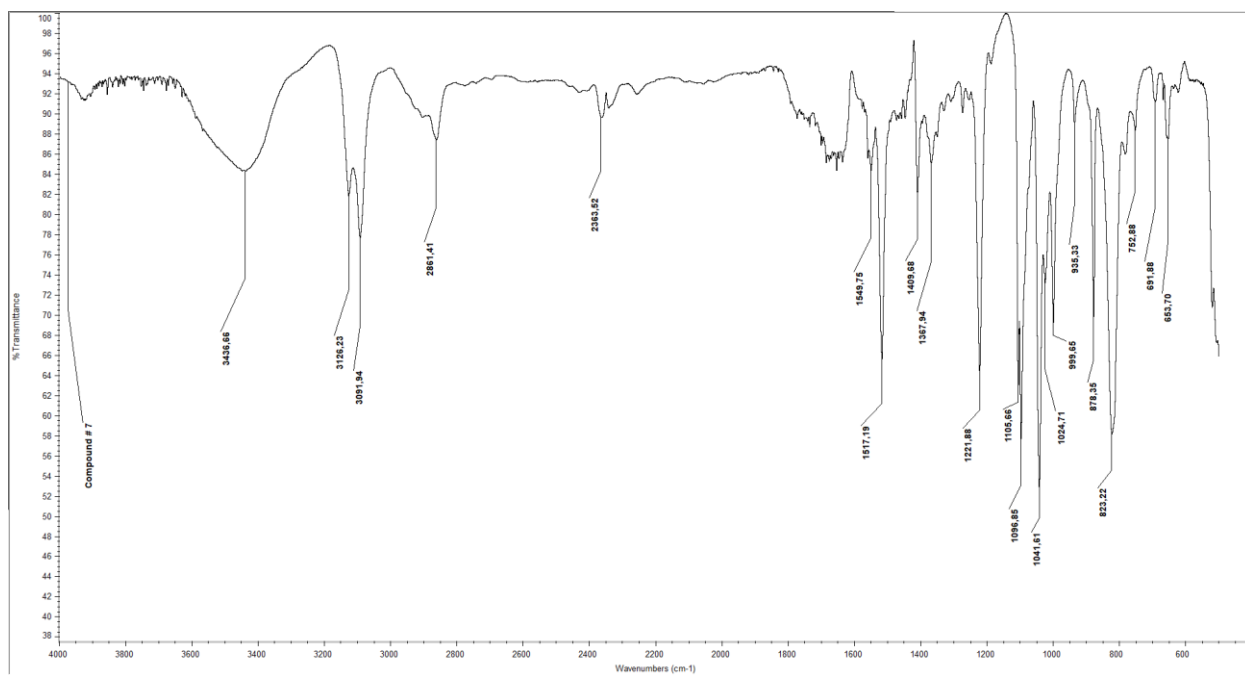

Figure S 25. IR spectrum of 7.

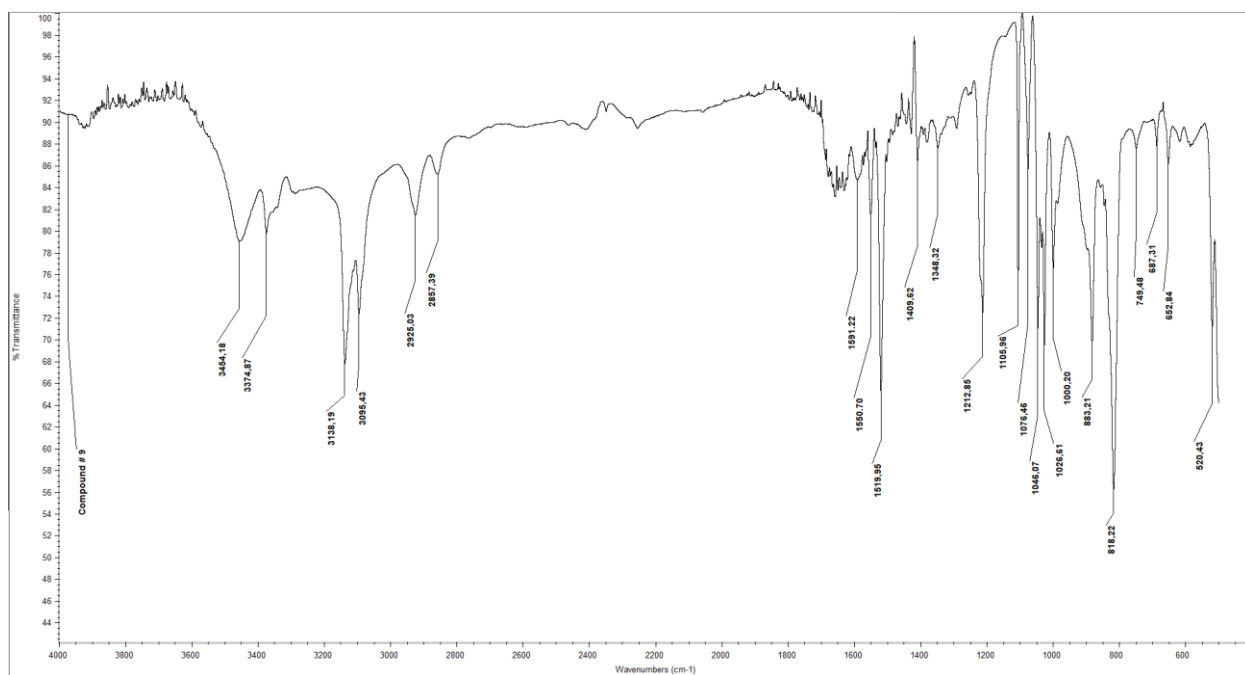

Figure S 26. IR spectrum of 9.



## References

- 1 J. Wan, Y. Shen, L. Xu, R. Xu, J. Zhang, H. Sun, C. Zhang, C. Yin and X. Wang, *J. Electroanal. Chem.*, 2021, **895**, 115374.
- 2 X. Wang, Y. Qi, Y. Shen, Y. Yuan, L. Zhang, C. Zhang and Y. Sun, *Sensors Actuators, B Chem.*, 2020, **310**, 127756.
- 3 Z. Guo, D. di Li, X. ke Luo, Y. hui Li, Q. N. Zhao, M. meng Li, Y. ting Zhao, T. shuai Sun and C. Ma, *J. Colloid Interface Sci.*, 2017, **490**, 11–22.
- 4 L. Xiao, H. Xu, S. Zhou, T. Song, H. Wang, S. Li, W. Gan and Q. Yuan, *Electrochim. Acta*, 2014, **143**, 143–151.
- 5 W. Ye, Y. Li, J. Wang, B. Li, Y. Cui, Y. Yang and G. Qian, *J. Solid State Chem.*, 2020, **281**, 121032.
- 6 M. Lu, Y. Deng, Y. Luo, J. Lv, T. Li, J. Xu, S. W. Chen and J. Wang, *Anal. Chem.*, 2019, **91**, 888–895.
